# Supplementary material
Source: PubMed Central journal article supplement (PMC6768635)
Supplement: supp_RA119.009616_153244_1_supp_374679_pvvggg.pdf [file supp_RA119.009616_153244_1_supp_374679_pvvggg.pdf]

## SUPPORTING INFORMATION

### **The small molecule nitazoxanide selectively disrupts BAM-mediated folding of the outer membrane usher protein**

John J. Psonis, Peter Chahales, Nadine S. Henderson, Nathan W. Rigel, Paul S. Hoffman, and David G. Thanassi

**Table S1.** Strains and plasmids used in this study.

**Table S2.** Oligonucleotides used in this study.

**Figure S1.** Model for BAM complex-mediated folding of the PapC usher and P pilus assembly by the CU pathway.

**Figure S2.** Effect of NTZ on BAM complex formation.

**Figure S3.** Detection of the PapC usher in intact bacteria.

**Figure S4.** The BamD<sub>P100S</sub> mutation.

**Data File S1.** Mutations identified by whole genome sequencing of selected strains from genetic screen.

**Table S1.** Strains and plasmids used in this study

| Strain or plasmid          | Relevant characteristic(s)                                                    | Reference or source |
|----------------------------|-------------------------------------------------------------------------------|---------------------|
| <u>Strains<sup>a</sup></u> |                                                                               |                     |
| BW25113                    | <i>LacI<sup>q</sup> rrnB ΔlacZ hsdR514 ΔaraBAD ΔrhaBAD</i>                    | (1)                 |
| BW25113Δ <i>bamB</i>       | BW25113 <i>bamB::kan</i>                                                      | (2)                 |
| BW25113Δ <i>bamC</i>       | BW25113 <i>bamC::kan</i>                                                      | (2)                 |
| BW25113Δ <i>bamE</i>       | BW25113 <i>bamE::kan</i>                                                      | (2)                 |
| MC4100                     | <i>F-araD139 (argF-lac)U169 rpsL150 relA1 flb5301 deoC1 ptsF25 thi</i>        | (3)                 |
| MC4100 <i>bamA101</i>      | MC4100 <i>ara<sup>r/-</sup> bamA101</i>                                       | (4)                 |
| <u>Plasmids</u>            |                                                                               |                     |
| pMON6235Δ <i>cat</i>       | Cloning vector, P <sub><i>ara</i></sub> , Amp <sup>r</sup>                    | (5)                 |
| pTRYC                      | Cloning vector, P <sub><i>trc</i></sub> , Clm <sup>r</sup>                    | (6)                 |
| pTRYC-NdeI                 |                                                                               | This study          |
| pACYC184                   | Cloning vector, P <sub><i>trc</i></sub> , Clm <sup>r</sup> , Tet <sup>r</sup> | (7)                 |
| pFJ20                      | pMON6235Δ <i>cat</i> derivative encoding PapC                                 | (8)                 |
| pMJ3                       | pMON6235Δ <i>cat</i> derivative encoding His-tagged PapC                      | (9)                 |
| pJP1                       | pMON6235Δ <i>cat</i> derivative encoding FLAG-tagged PapC                     | This study          |
| pJH114                     | pTRC99a/NdeI derivative encoding BamABCDE-His                                 | (10)                |
| pBAD18:: <i>bamB</i>       | pBAD18 derivative encoding BamB                                               | (11)                |
| pBamE-His                  | pET22-42 derivative encoding BamE-His                                         | (12)                |
| pBamABCDE                  | pTRYC derivative encoding BamABCDE-His                                        | This study          |
| pBamA                      | pTRYC derivative encoding BamA                                                | This study          |
| pBamB                      | pTRYC derivative encoding BamB                                                | This study          |
| pBamE                      | pTRYC derivative encoding BamE-His                                            | This study          |
| pFJ29                      | pACYC184 derivative encoding the whole pap operon                             | (8)                 |

<sup>a</sup>All strains are *E. coli* K-12.

Amp<sup>r</sup>, ampicillin resistance; Clm<sup>r</sup>, chloramphenicol resistance; Tet<sup>r</sup>, tetracycline resistance; P<sub>*ara*</sub>, arabinose-inducible promoter, P<sub>*trc*</sub>, IPTG-inducible promoter.

**Table S2.** Oligonucleotides used in this study

| Primer name                                       | Sequence (5' - 3')                                                                              |
|---------------------------------------------------|-------------------------------------------------------------------------------------------------|
| <u>Bam mutant verification</u>                    |                                                                                                 |
| bamBUPFwd                                         | 5'-CTGAAAACCCTTGATACCAT-3'                                                                      |
| bamBDOWNRev                                       | 5'-ATAAATCATCAGACAACGC-3'                                                                       |
| bamCUPFwd                                         | 5'-GCCATTACACAACAACTAT-3'                                                                       |
| bamCDOWNRev                                       | 5'-GTTTGCATATCATATCAGAA-3'                                                                      |
| bamEUPFwd                                         | 5'-AAGTCACACGTAATACT-3'                                                                         |
| bamEDOWNRev                                       | 5'-AGCGAATAAATAACAGACAG-3'                                                                      |
| bamBUPFwd                                         | 5'-CTGAAAACCCTTGATACCAT-3'                                                                      |
| <u>Bam cloning</u>                                |                                                                                                 |
| bamE-HisFwd                                       | 5'-GCGCGCAATTCATGCGCTGTAAAACGCT GACTGC-3'                                                       |
| bamE-HisRev                                       | 5'-GCGCGCAAGCTTTTAGTGGTGGTGGTGGT GTGGTG-3'                                                      |
| pTRYC/NdeIFwd                                     | 5'-CACACAGGAAACAGCATATGGAATTCGA GCTCGG-3'                                                       |
| pTRYC/NdeIRev                                     | 5'-CCGAGCTCGAATTCCATATGCTGTTTCCTGTGTG-3'                                                        |
| bamFwd                                            | 5'-GATATACATATGGTTAGGAAGAACGCAT AATAACG-3'                                                      |
| bamRev                                            | 5'-TATATACCCGGGTTAGTGGTGTGATGATGGTGTGATGAT-3'                                                   |
| BamAREVXmaI                                       | 5'-CTTATTACCCGGGCACTTACCAGGTTTTACGATG-3'                                                        |
| <u>PapC 3X FLAG</u>                               |                                                                                                 |
| PapCflFW_tail                                     | 5'-GACTACAAGGACCACGACGGTGACTACAAGGACCACGACATCG<br>ACTACAAGGACGACGACGACAAG GGGGAAAAAACGACAAAC-3' |
| PapCflFW_short                                    | 5'-GGGGAAAAAACGACAAACAGAAATTTACATGGAGTCGCTTTTA<br>TCTGTTCCGTGCCATT-3'                           |
| PapCflRev_tail                                    | 5'-CTTGTCGTCGTCGTCCTTGTAGTCGATGTCGTGGTCCTTGTAGT<br>CACCGTCGT GGTCTTGTAGTCGTTGTAGCGGCTCTGCTC-3'  |
| PapCflRev_short                                   | 5'-GTTGTAGCGGCTCTGCTCCTGGCTTCCCTGATAGTCAGC-3'                                                   |
| <u>no-SCAR mutagenesis (BamD<sub>P100S</sub>)</u> |                                                                                                 |
| sgRNA-target-F                                    | 5'-TATTCGGATGGGTCGGGTTAGTTTTAGAGCTAGAAATAGCAAG-3'                                               |
| sgRNA-target-R                                    | 5'-TAACCCGACCCATCCGAATAGTGCTCAGTATCTCTACTGA-3'                                                  |

|            |                                                                                               |
|------------|-----------------------------------------------------------------------------------------------|
| CPEC rev 2 | 5'-CCAATTGTCCATATTGCATCA-3'                                                                   |
| CPEC2F     | 5'-CGGCGTCACACTTTGCTAT-3'                                                                     |
| gamR       | 5'- TTTATAACCTCCTTAGAGCTCGA-3'                                                                |
| pKDseq5    | 5'-CAGTGAATGGGGGTAAATGG-3'                                                                    |
| sgrnaR     | 5'-GCCTGCAGTCTAGACTCGAG-3'                                                                    |
| sgrnaA     | 5'-AGCTTTCGCTAAGGATGATTT-3'                                                                   |
| BamDP100S  | 5'-TGCCGTTAGCACAGGCTGCCATCGATCGTTTTATTTCGCCTTAATA<br>GCAC CCA TCCGAATATCGATTATGTCATGTACATG-3' |

---

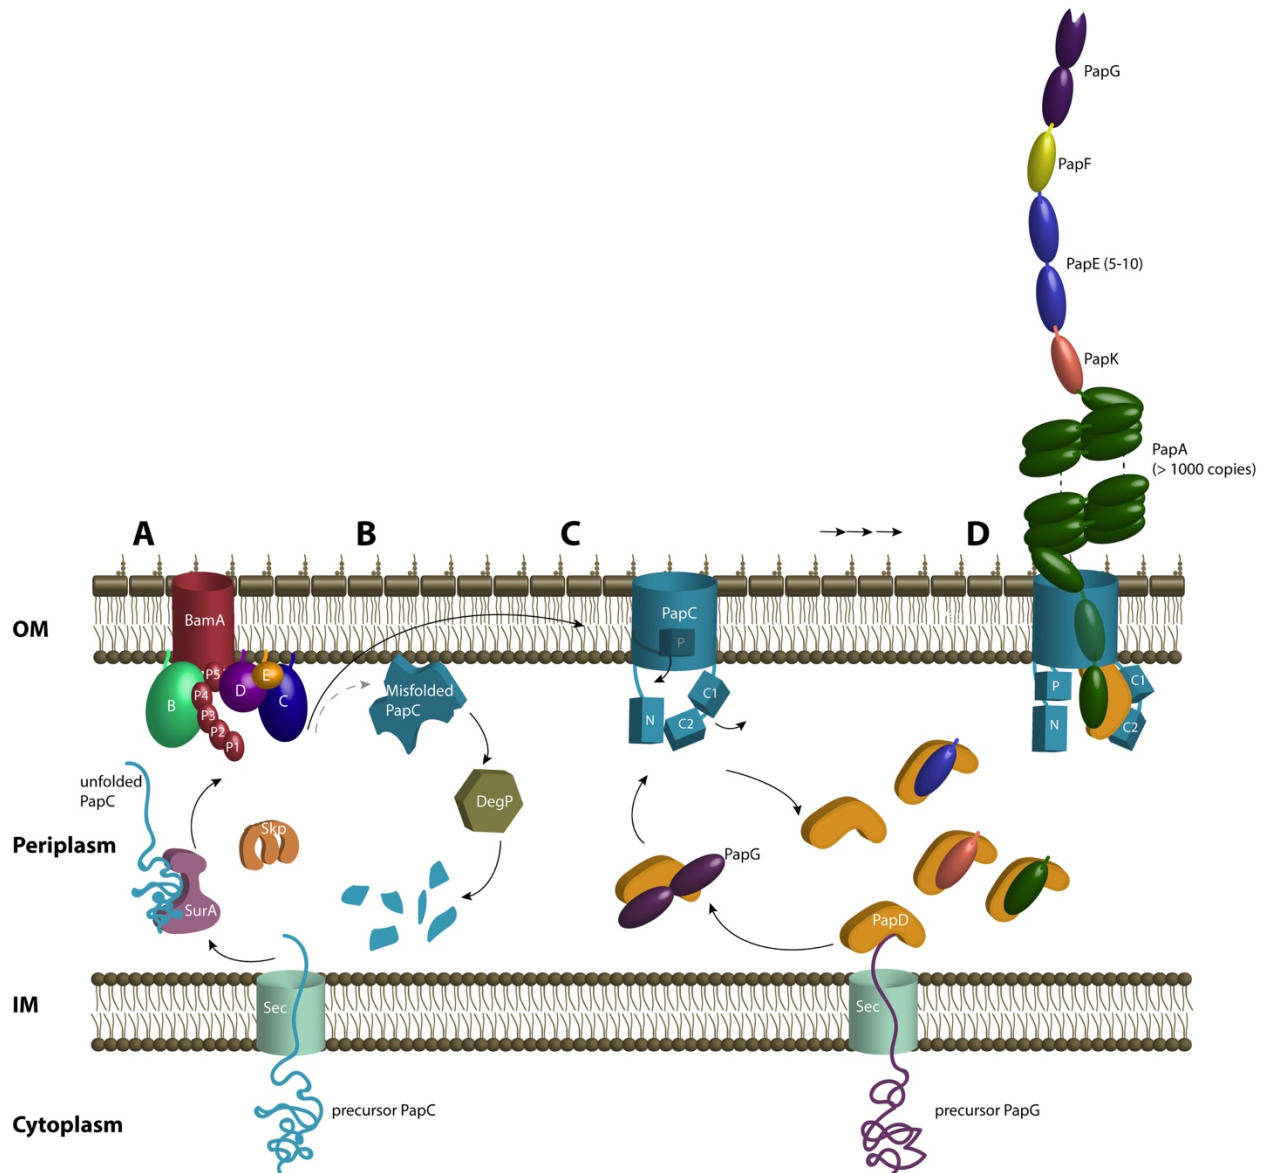

**Figure S1.** Model for BAM complex-mediated folding of the PapC usher and P pilus assembly by the CU pathway. (A) In *E. coli*, the BAM complex consists of BamA, an OM  $\beta$ -barrel protein with five N-terminal POTRA domains (P1–P5), and the lipoproteins BamB–E. Nascent OMPs such as PapC are translocated across the inner membrane (IM) via the Sec pathway into the periplasm. Chaperones such as SurA, Skp, and DegP recognize unfolded OMPs in the periplasm and transport them to the BAM complex. The BAM complex then catalyzes the proper assembly and insertion of the protein into the OM. The usher follows a SurA-BamB folding pathway. (B) Substrates that fall off-pathway are targeted for degradation by periplasmic proteases such as DegP. (C) The usher (PapC) comprises an OM  $\beta$ -barrel channel domain, a plug domain (P), and N- and C-terminal periplasmic domains (N, C1 and C2). Upon entering the periplasm via the Sec pathway, nascent pilus subunits form binary complexes with the pilus chaperone (PapD), which facilitates subunit folding. Periplasmic chaperone-subunit complexes are recruited by the usher in a sequential manner. The usher catalyzes the exchange of chaperone-subunit for subunit-subunit interactions to build the pilus fiber and provides the channel for secretion of the fiber to the cell surface.

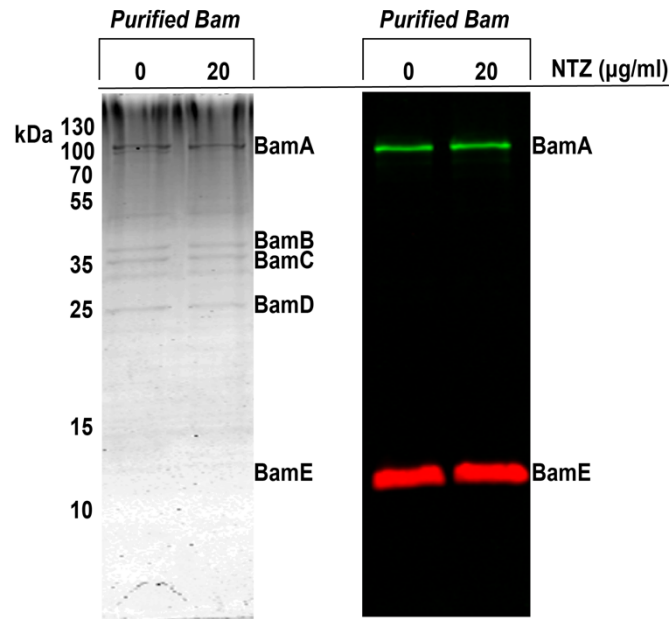

**Figure S2.** Effect of NTZ on BAM complex formation. Strain BW25113/ pBamABCDE-His<sub>6</sub>, expressing the BAM complex with a His-tagged BamE, was grown in the presence of 0 or 20 µg/ml NTZ, OM fractions were isolated, and the detergent-extracted complex was captured by nickel affinity chromatography. Proteins eluted from the column were then analyzed by staining with Coomassie blue (left panel) or immunoblotting with anti-His-tag and anti-BamA antibodies (right panel).

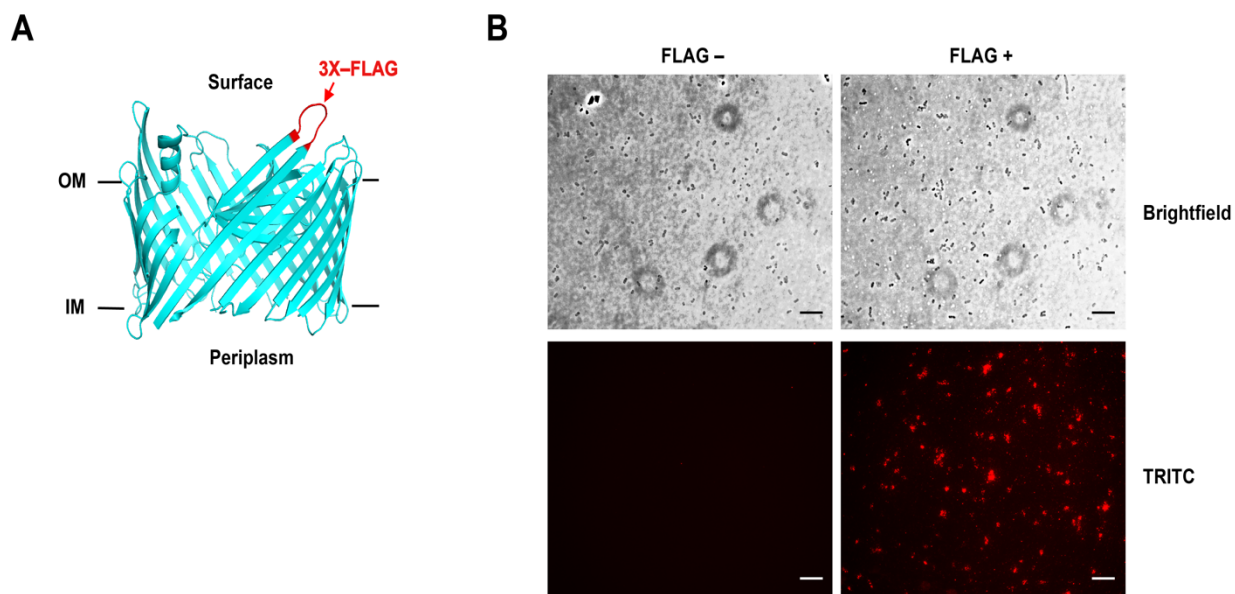

**Figure S3.** Detection of the PapC usher in intact bacteria. (A) Structure of PapC [PDB ID: 2VQI] showing surface-exposed loop between  $\beta$ -strands 3 and 4 where the 3X FLAG tag was inserted. (B) Intact bacteria from cultures of BW25113/pMJ3 (PapC<sub>His</sub>; FLAG-) or BW25113/pJP1 (PapC<sub>FLAG</sub>; FLAG+) were labeled with a PE-conjugated anti-FLAG antibody to detect PapC levels in the OM and the bacteria were imaged by fluorescence microscopy at 100X magnification. Representative brightfield (top panels) and TRITC-filter (bottom panels) images are shown. Scale bar represents 10  $\mu$ m.

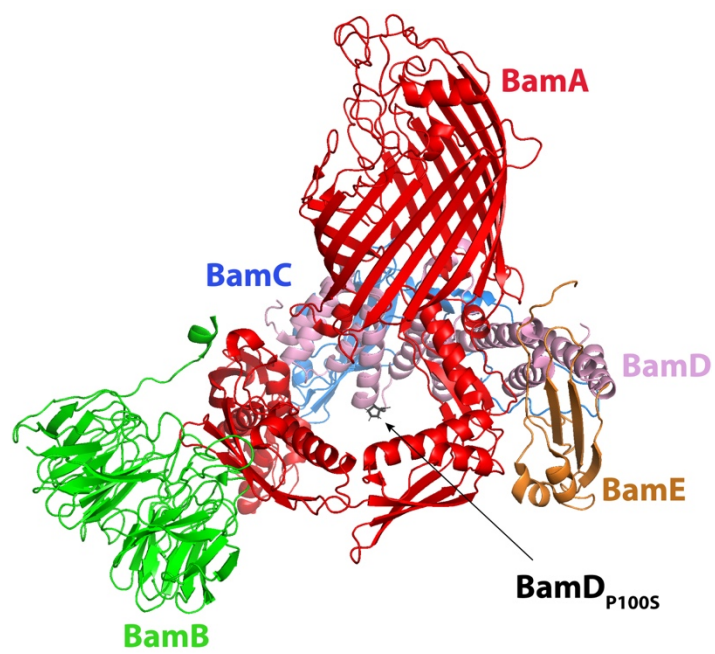

**Figure S4.** The BamD<sub>P100S</sub> mutation. Structure of the BAM complex (PDB ID: 5LJO) showing location of the BamD<sub>P100S</sub> mutation.



## References

1. Datsenko, K. A., and Wanner, B. L. (2000) One-step inactivation of chromosomal genes in *Escherichia coli* K-12 using PCR products. *Proc. Natl. Acad. Sci. U.S.A.* **97**, 6640-6645
2. Baba, T., Ara, T., Hasegawa, M., Takai, Y., Okumura, Y., Baba, M., Datsenko, K. A., Tomita, M., Wanner, B. L., and Mori, H. (2006) Construction of *Escherichia coli* K-12 in-frame, single-gene knockout mutants: the Keio collection. *Mol. Syst. Biol.* **2**, 2006 0008
3. Boyd, D., Weiss, D. S., Chen, J. C., and Beckwith, J. (2000) Towards single-copy gene expression systems making gene cloning physiologically relevant: lambda InCh, a simple *Escherichia coli* plasmid-chromosome shuttle system. *J. Bacteriol.* **182**, 842-847
4. Ricci, D. P., Hagan, C. L., Kahne, D., and Silhavy, T. J. (2012) Activation of the *Escherichia coli*  $\beta$ -barrel assembly machine (Bam) is required for essential components to interact properly with substrate. *Proc. Natl. Acad. Sci. U.S.A.* **109**, 3487-3491
5. Jones, C. H., Danese, P. N., Pinkner, J. S., Silhavy, T. J., and Hultgren, S. J. (1997) The chaperone-assisted membrane release and folding pathway is sensed by two signal transduction systems. *EMBO J.* **16**, 6394-6406
6. Wright, K. J., Seed, P. C., and Hultgren, S. J. (2007) Development of intracellular bacterial communities of uropathogenic *Escherichia coli* depends on type 1 pili. *Cell Microbiol.* **9**, 2230-2241
7. Rose, R. E. (1988) The nucleotide sequence of pACYC184. *Nucleic Acids Res.* **16**, 355
8. Jacob-Dubuisson, F., Striker, R., and Hultgren, S. J. (1994) Chaperone-assisted self-assembly of pili independent of cellular energy. *J. Biol. Chem.* **269**, 12447-12455
9. Thanassi, D. G., Saulino, E. T., Lombardo, M. J., Roth, R., Heuser, J., and Hultgren, S. J. (1998) The PapC usher forms an oligomeric channel: implications for pilus biogenesis across the outer membrane. *Proc. Natl. Acad. Sci. U.S.A.* **95**, 3146-3151
10. Roman-Hernandez, G., Peterson, J. H., and Bernstein, H. D. (2014) Reconstitution of bacterial autotransporter assembly using purified components. *Elife* **3**, e04234
11. Wu, T., Malinverni, J., Ruiz, N., Kim, S., Silhavy, T. J., and Kahne, D. (2005) Identification of a multicomponent complex required for outer membrane biogenesis in *Escherichia coli*. *Cell* **121**, 235-245
12. Sklar, J. G., Wu, T., Gronenberg, L. S., Malinverni, J. C., Kahne, D., and Silhavy, T. J. (2007) Lipoprotein SmpA is a component of the YaeT complex that assembles outer membrane proteins in *Escherichia coli*. *Proc. Natl. Acad. Sci. U.S.A.* **104**, 6400-6405
